# Supplementary material
Source: Springer Nature journal article supplement (https://www.springermedizin.de/resource/supplementary/12885_2011_3057_MOESM5_ESM.pdf/9464184)

A

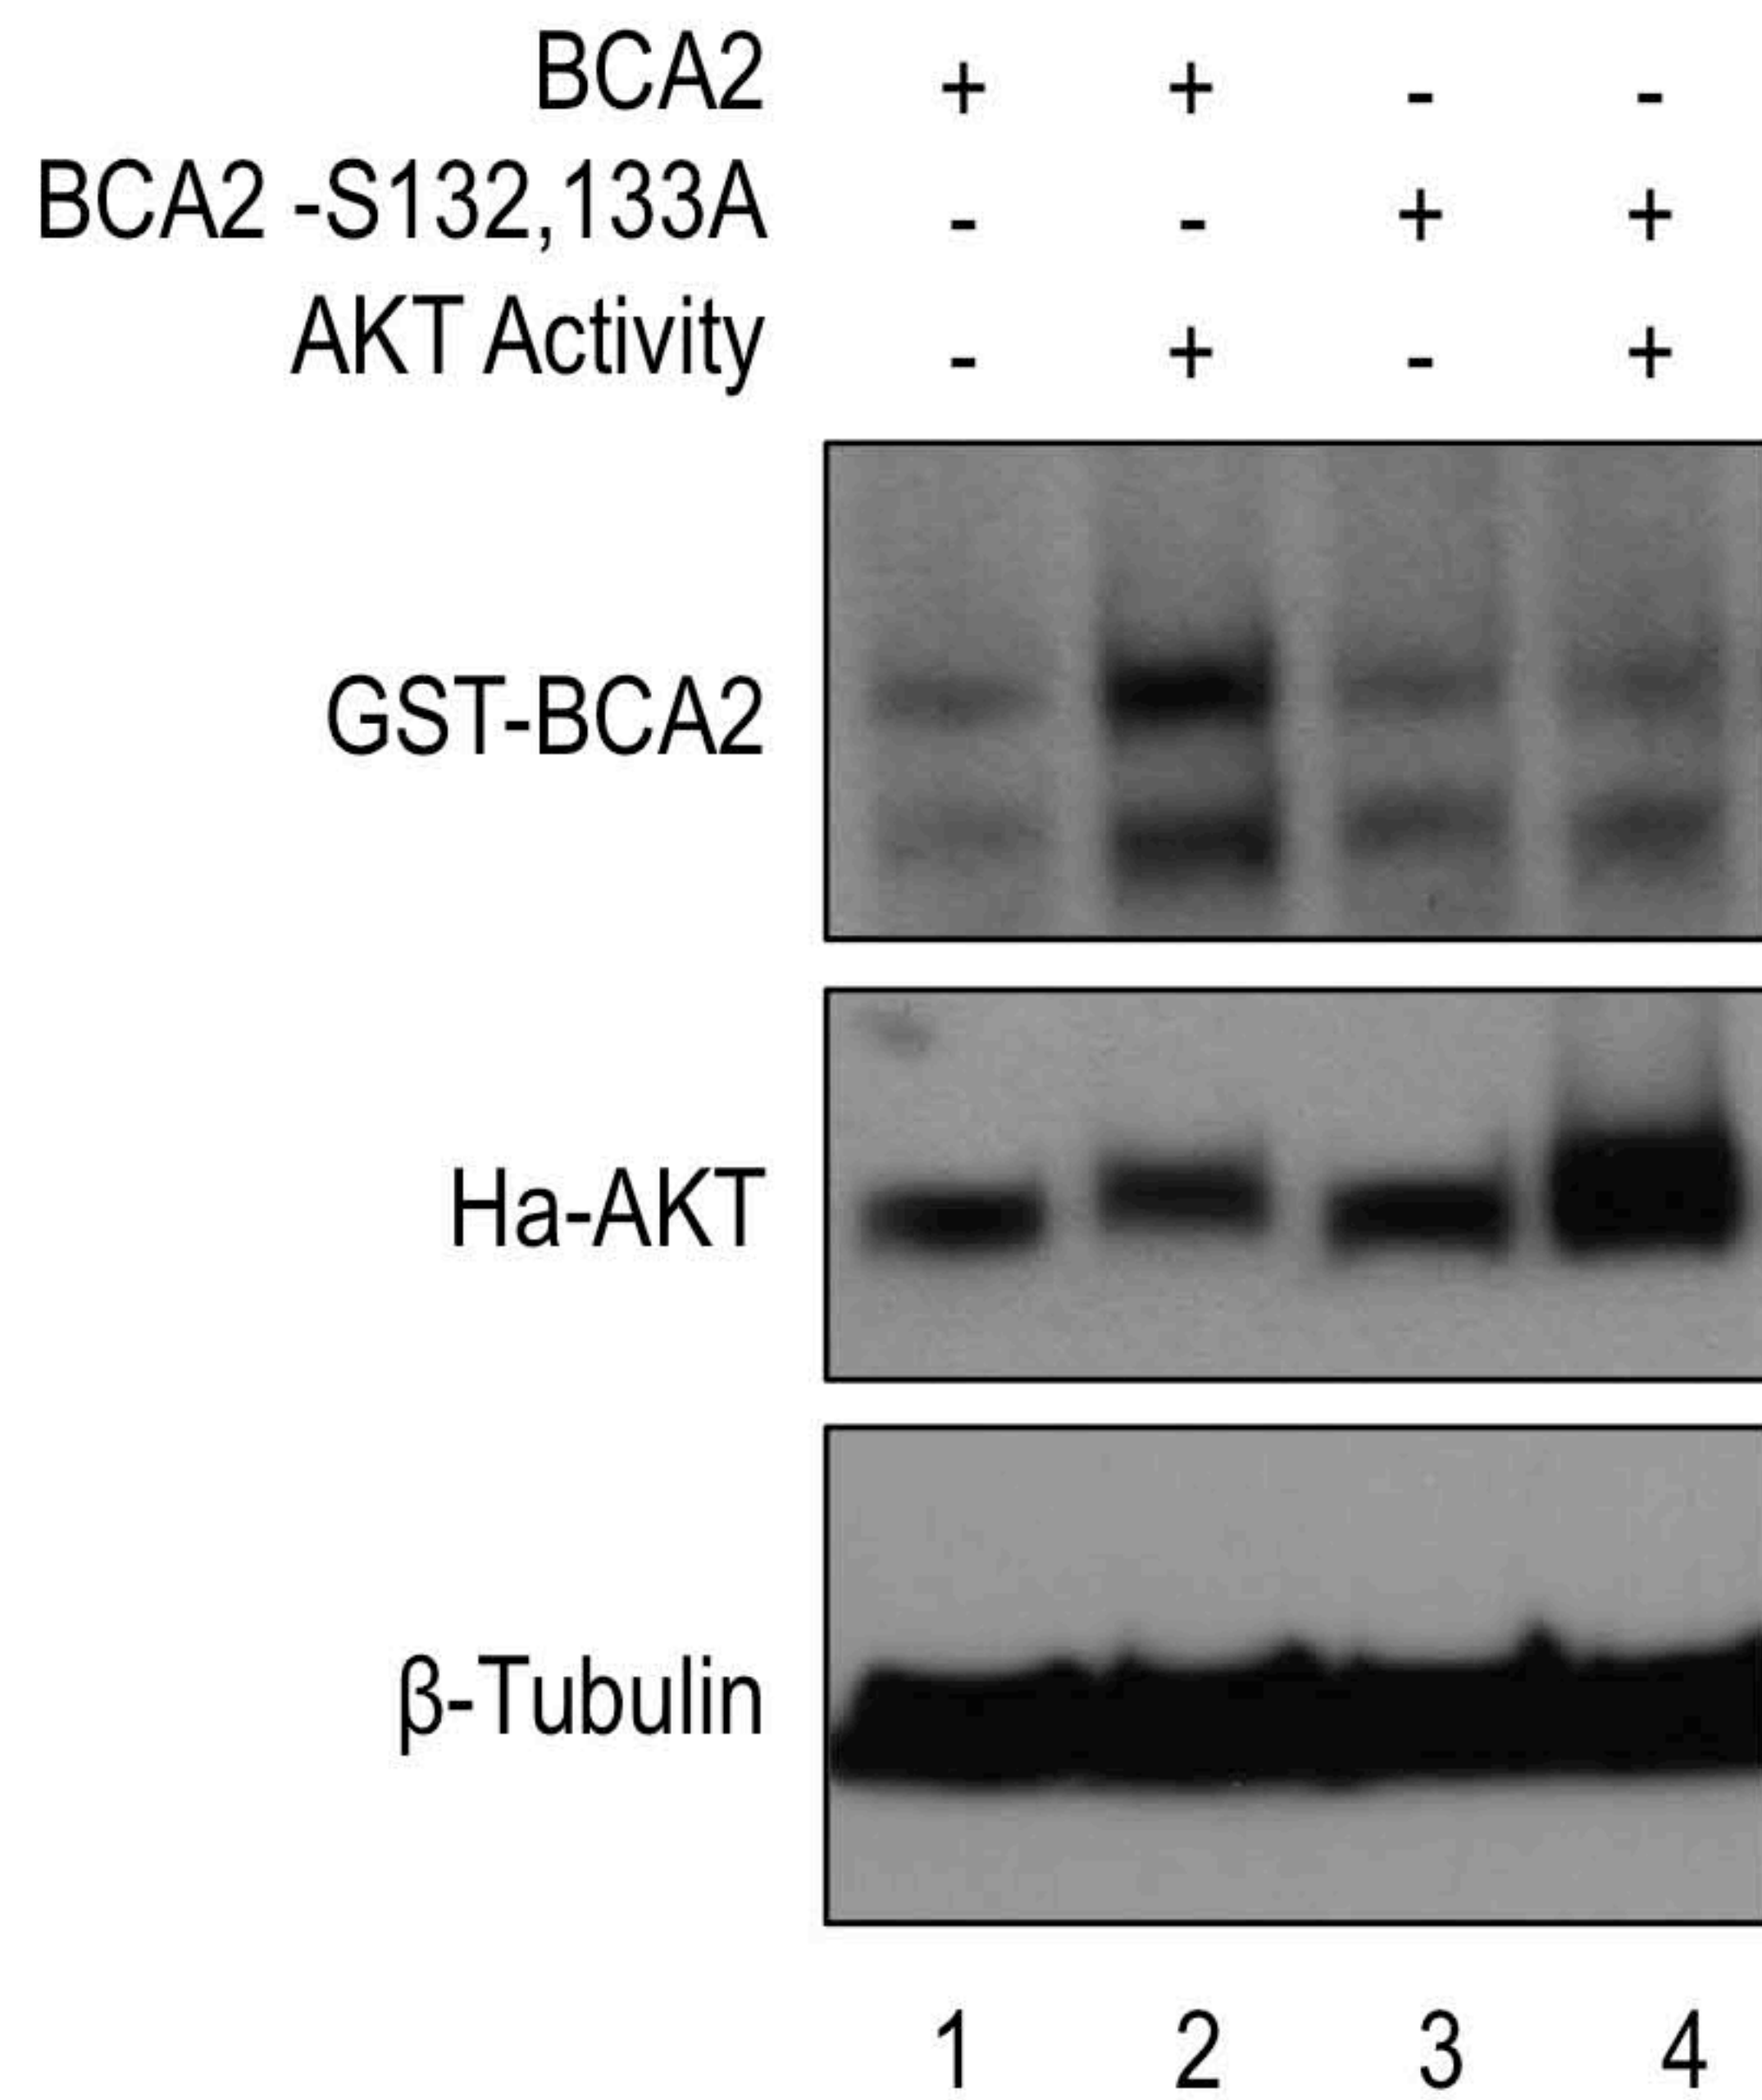

B

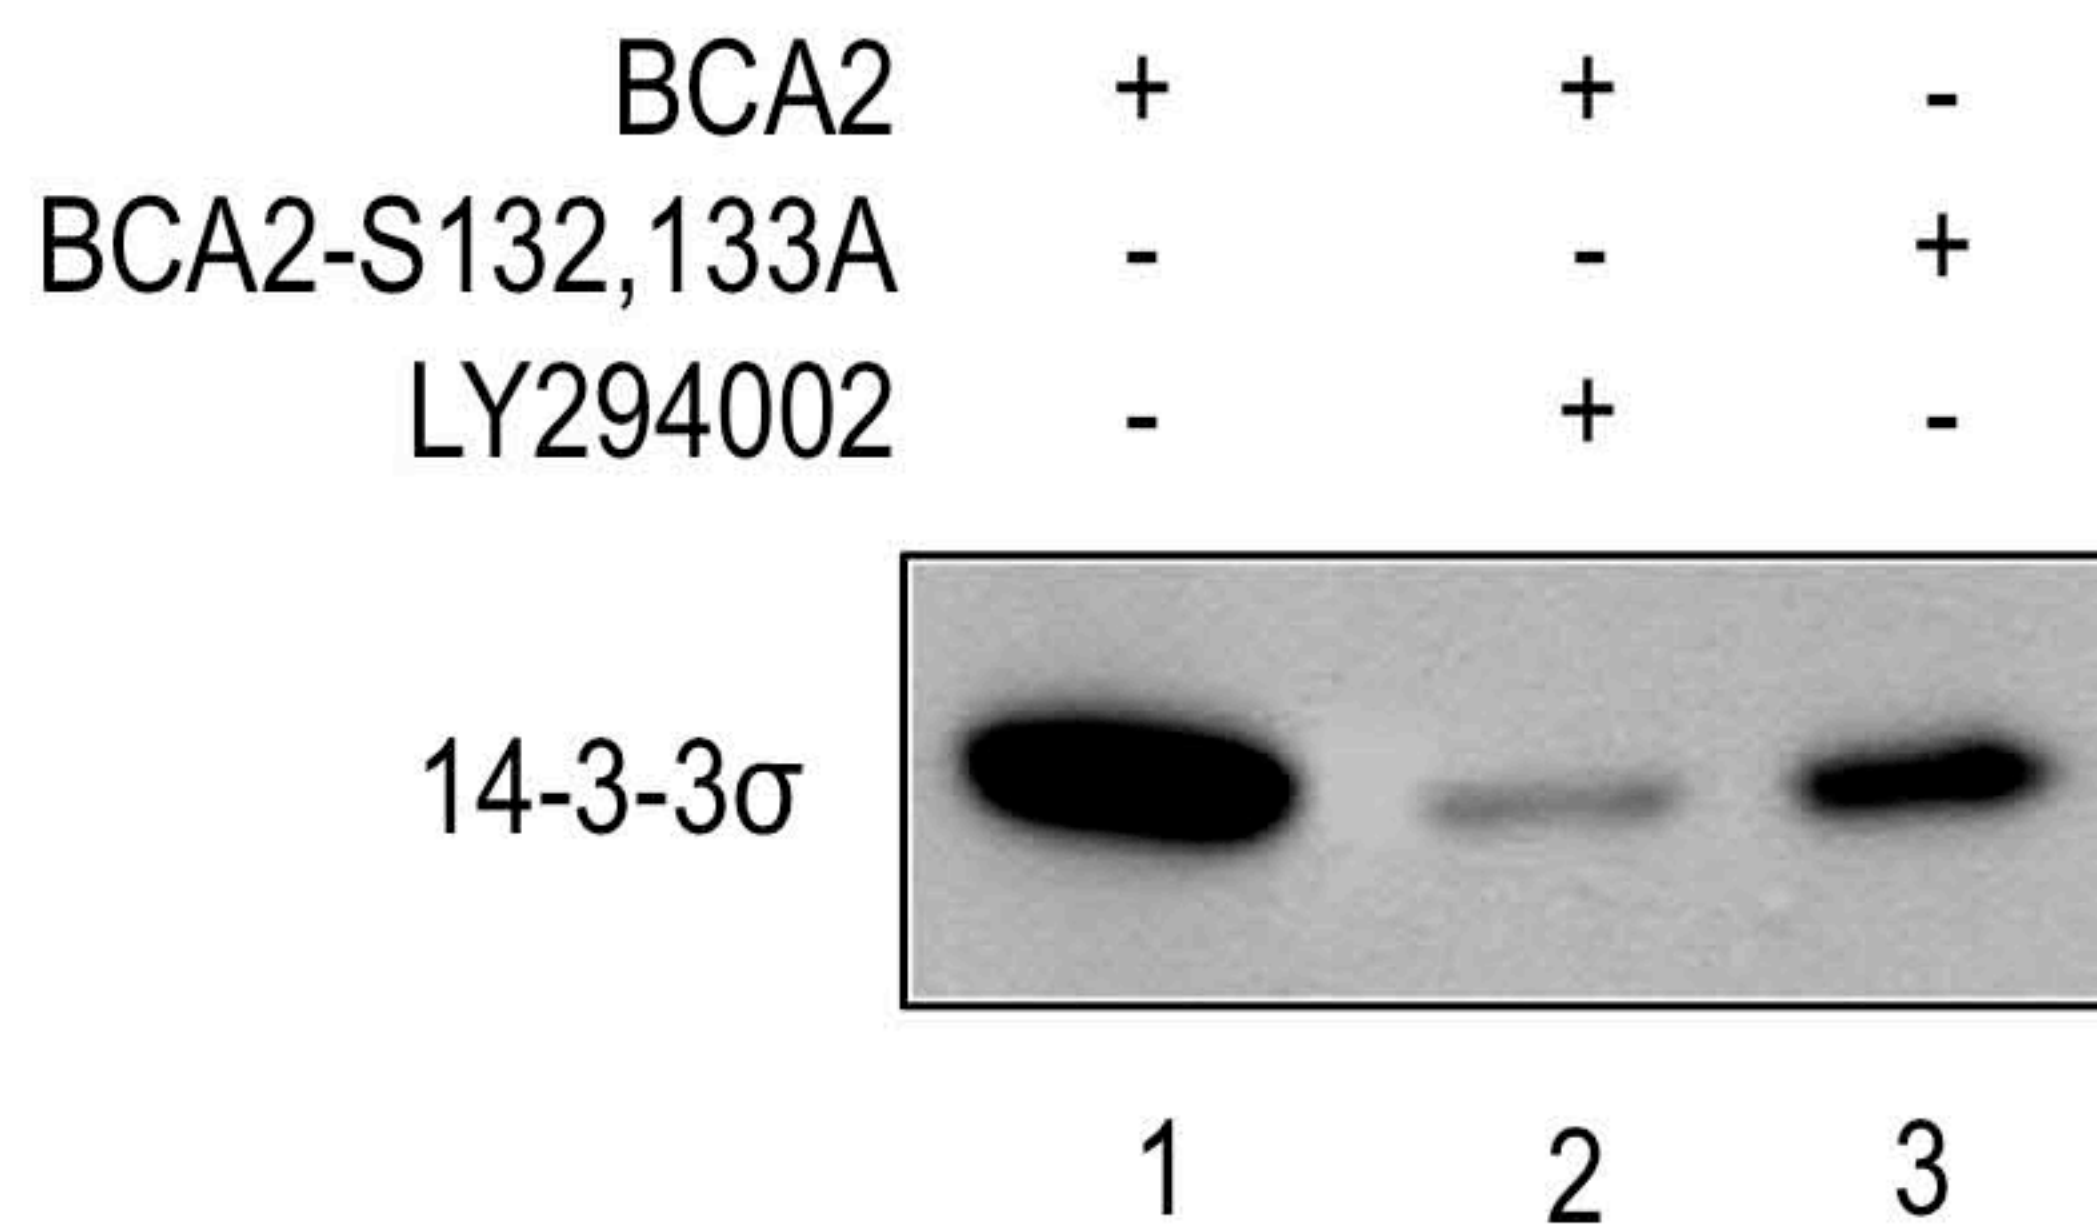

C

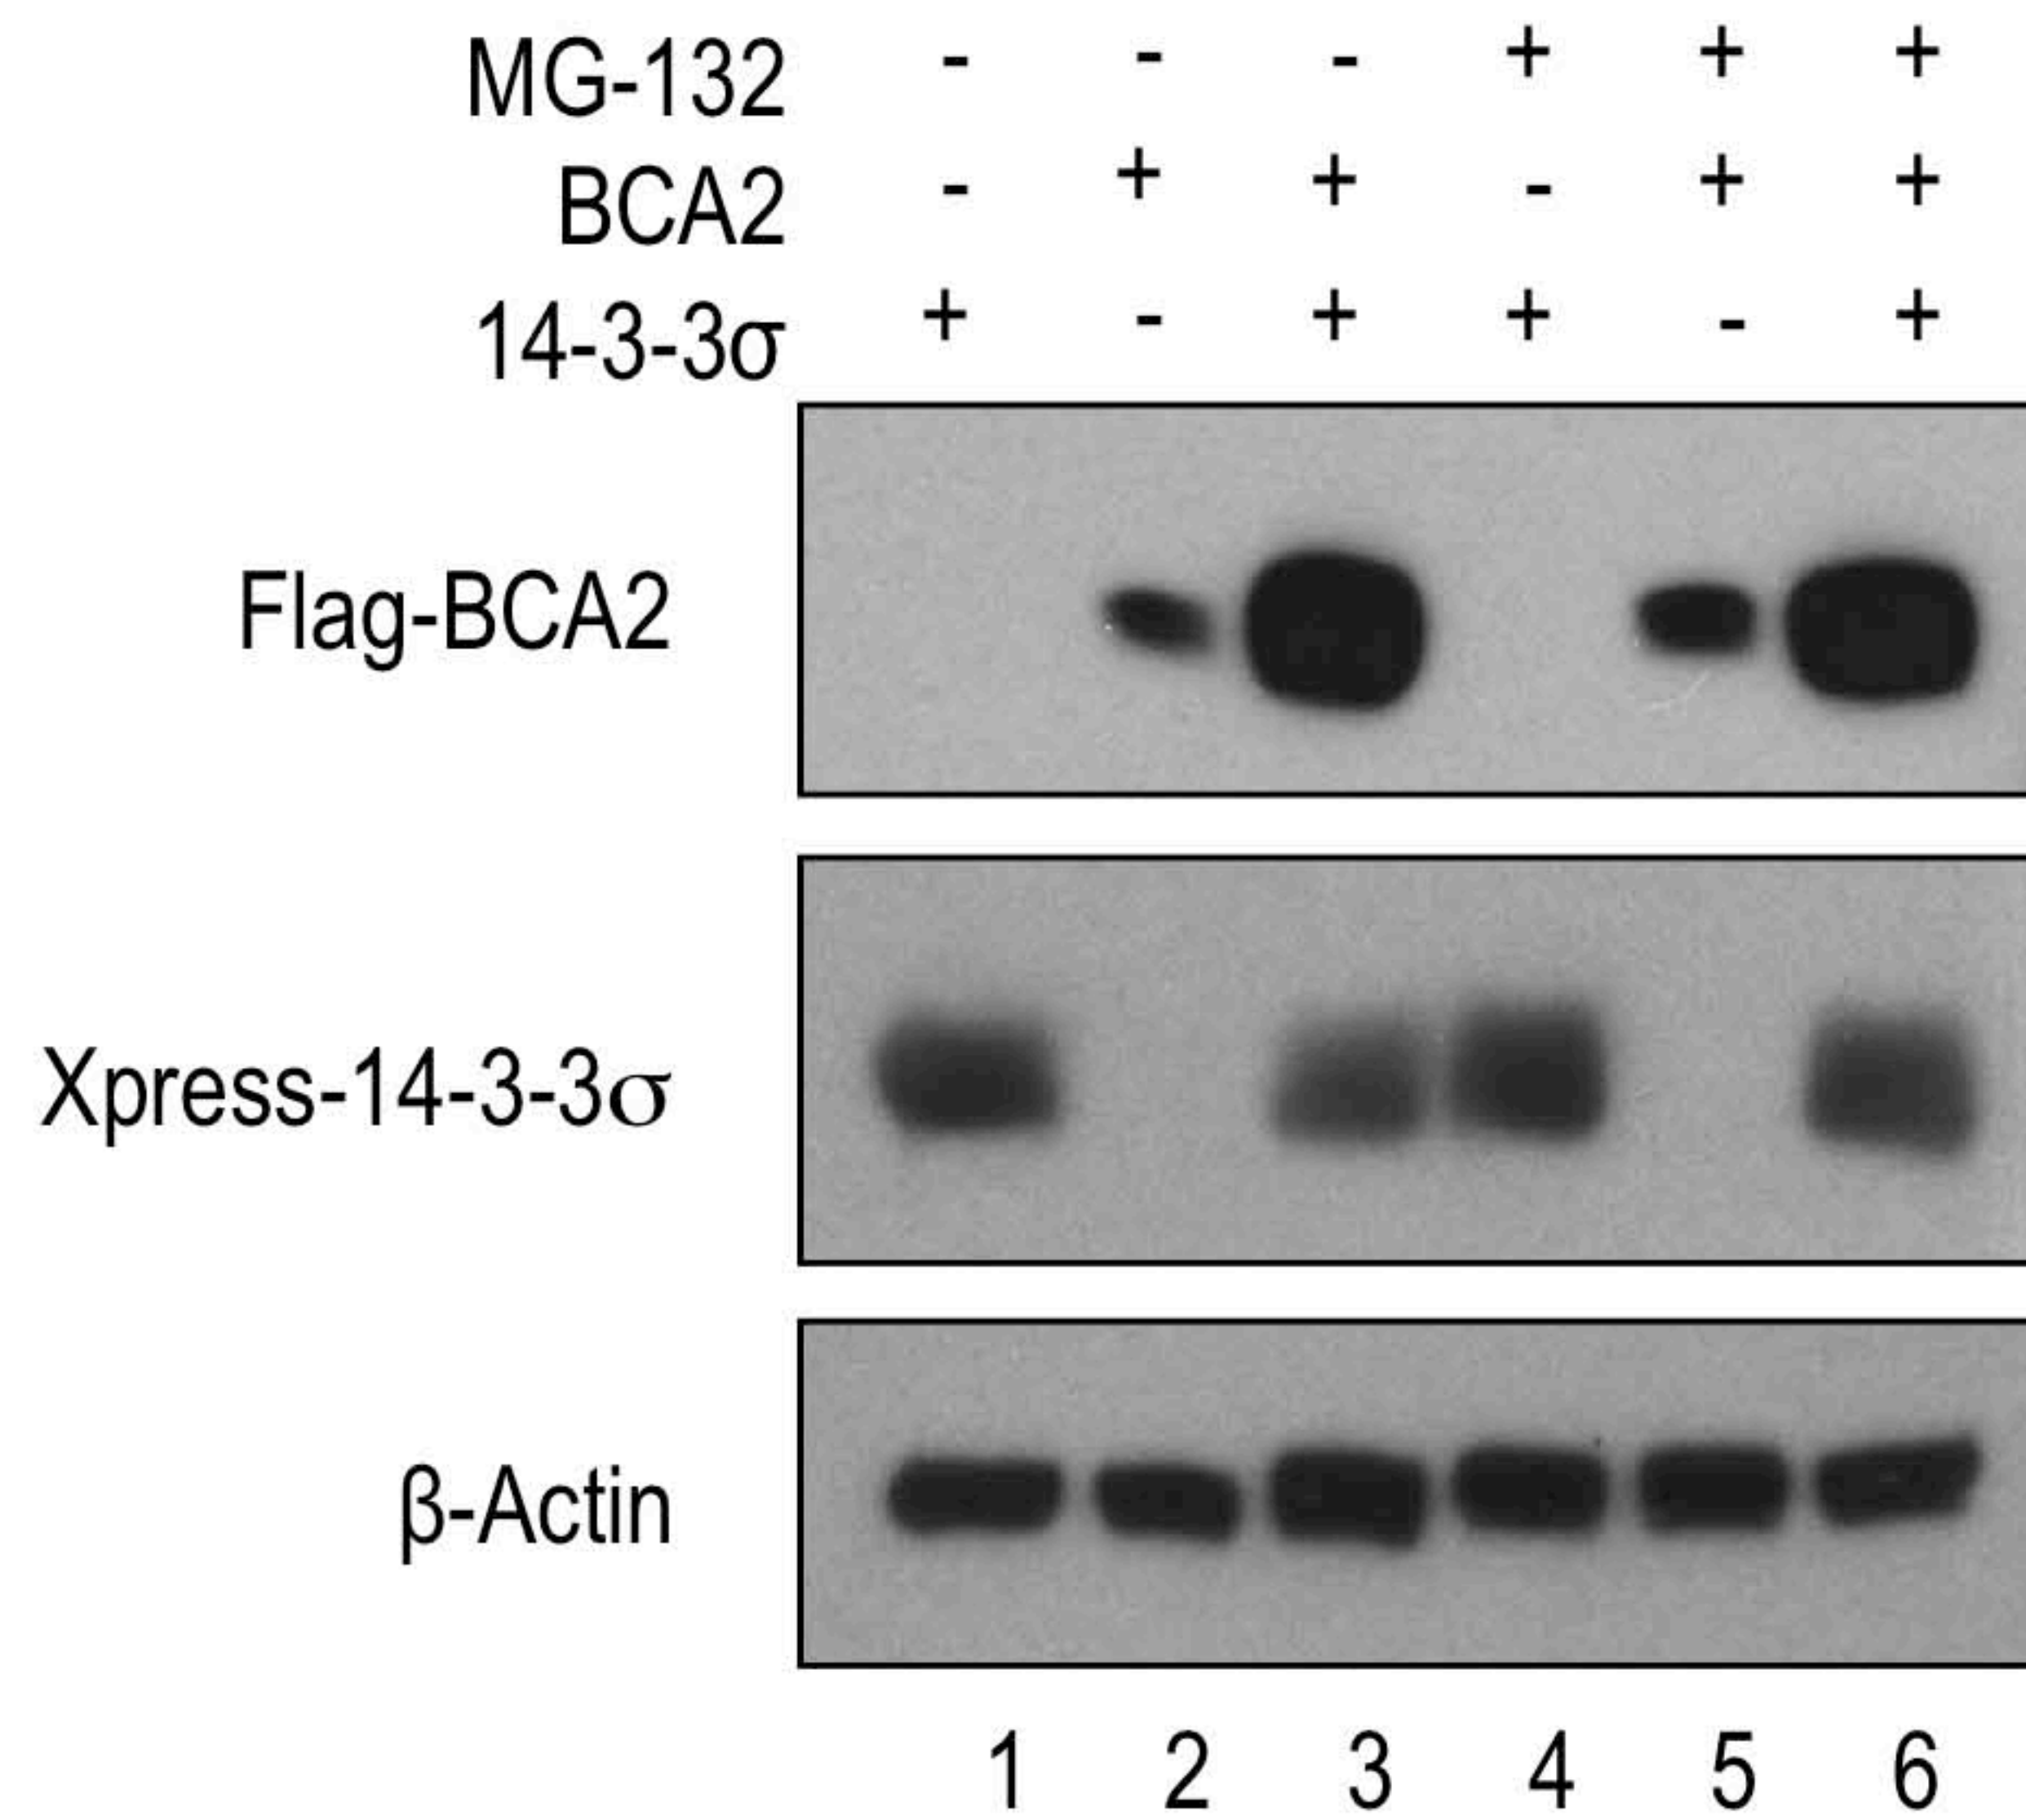

Supplement: MOESM5 [file 9464184]
